# Supplementary material
Source: PubMed Central journal article supplement (PMC4314222)
Supplement: supp_fj.14-262048_Supplemental_Figure.pdf [file supp_fj.14-262048_Supplemental_Figure.pdf]

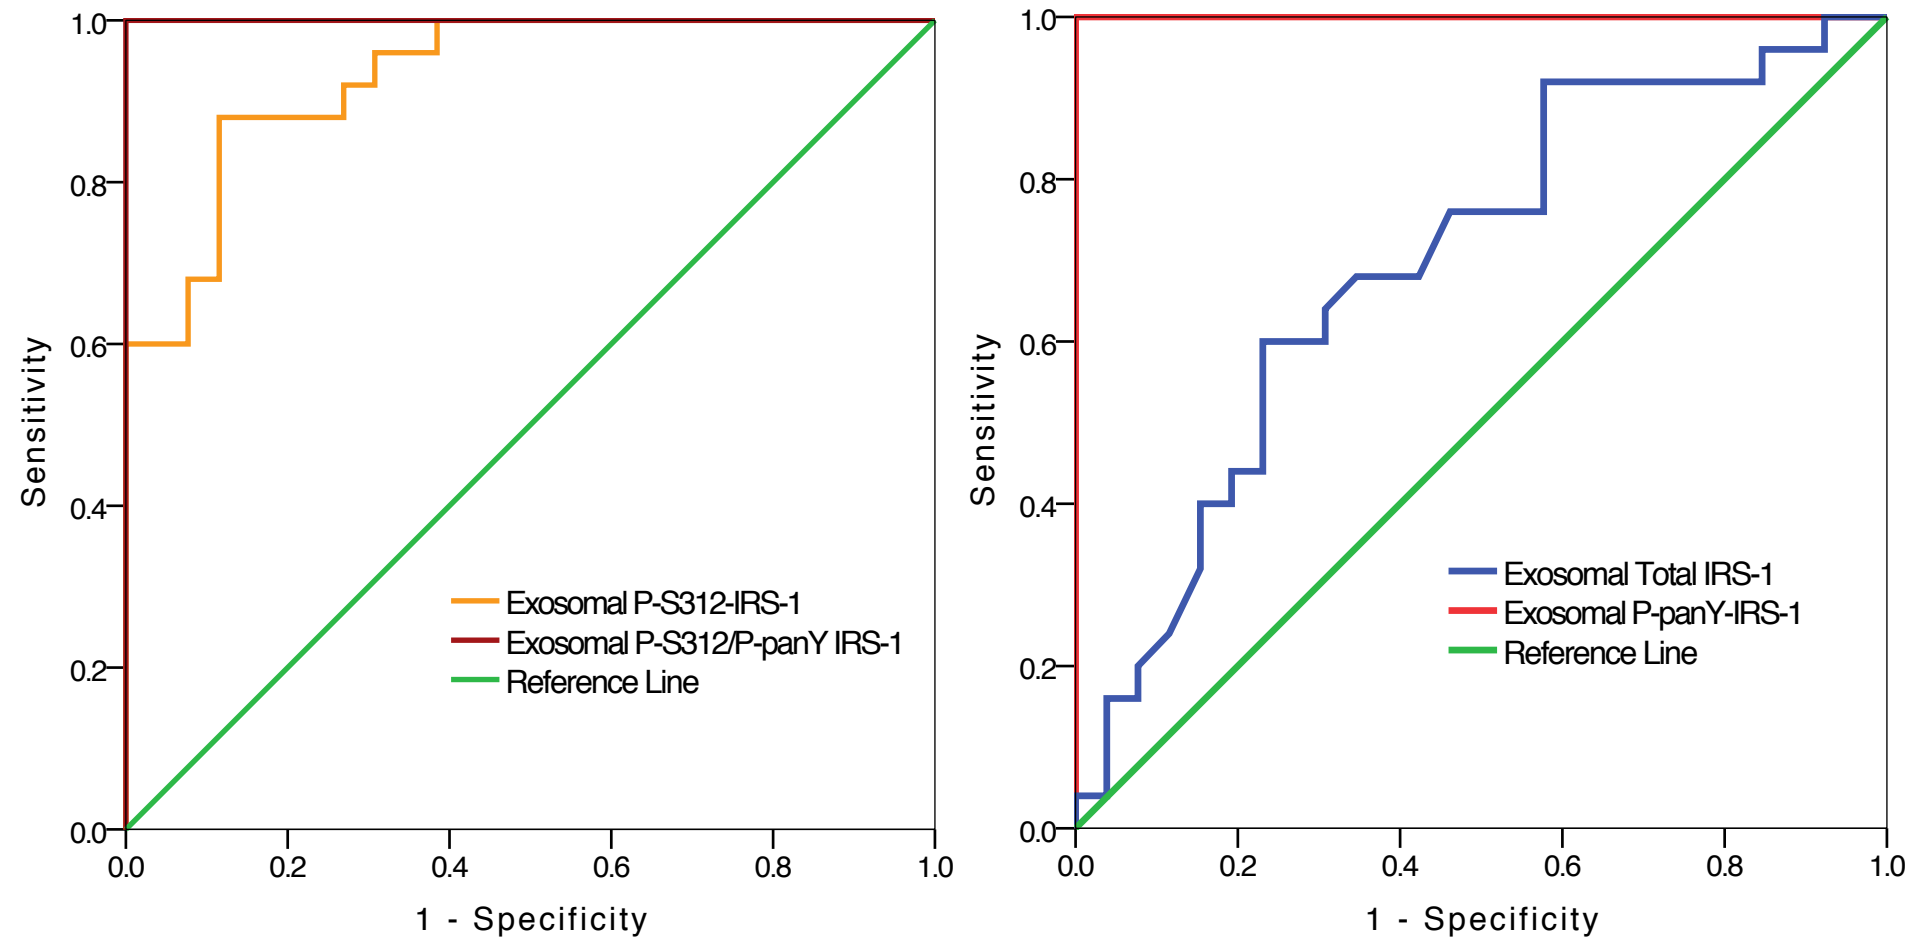

**Figure S1.** Receiver Operator Characteristic (ROC) curves for classification of patients with AD vs. matched controls (AC) based on exosomal levels of P-S312-IRS-1 (left-hand plot) or P-panY-IRS-1 and total IRS-1 (together in the right-hand plot).
